# Supplementary material for: Ethnographic process evaluation in primary care: explaining the complexity of implementation
Source: BMC Health Serv Res. 2014 Dec 5;14:607. doi: 10.1186/s12913-014-0607-0 (PMC4265455; doi:10.1186/s12913-014-0607-0)
Supplement: Additional file 1: — A.L.L. Study - Weekly Site Coordinator Feedback Log. [file 12913_2014_607_MOESM1_ESM.pdf]

## A.L.L. Study - Weekly Site Coordinator Feedback Log

|                                                                                                                                                                                                                                                                                                                                                                                                                                                       |  |                                             |  |
|-------------------------------------------------------------------------------------------------------------------------------------------------------------------------------------------------------------------------------------------------------------------------------------------------------------------------------------------------------------------------------------------------------------------------------------------------------|--|---------------------------------------------|--|
| <b>Date:</b>                                                                                                                                                                                                                                                                                                                                                                                                                                          |  | <b>Name:</b>                                |  |
| <b>Please include anything you think might help us understand barriers and facilitators to OCHIN A.L.L. implementation.</b>                                                                                                                                                                                                                                                                                                                           |  |                                             |  |
| <b>Reminders:</b> <ul style="list-style-type: none"><li>• Goal is to reveal the stories and ongoing process of implementation.</li><li>• Please be specific and include details (how, who, what, &amp; when) whenever possible.</li><li>• Note the feedback source (i.e., nurse, doctor, MA, patient, etc.)</li><li>• Use square brackets when sharing your insights or interpretations.</li><li>• Use quotation marks for verbatim quotes.</li></ul> |  |                                             |  |
| <b>Potential topics for your feedback log:</b>                                                                                                                                                                                                                                                                                                                                                                                                        |  |                                             |  |
| ✓ Implementation (Day-to-day logistics)                                                                                                                                                                                                                                                                                                                                                                                                               |  | ✓ Surprises, Challenges, and Solutions      |  |
| ✓ Communication (Formal and Informal)                                                                                                                                                                                                                                                                                                                                                                                                                 |  | ✓ Unresolved or ongoing issues              |  |
| ✓ Tools (BPA, Inreach and Outreach Solutions rosters, and education materials)                                                                                                                                                                                                                                                                                                                                                                        |  | ✓ Other feedback that you think is relevant |  |
|                                                                                                                                                                                                                                                                                                                                                                                                                                                       |  |                                             |  |
